# Supplementary material for: Nuclear Nox4 interaction with prelamin A is associated with nuclear redox control of stem cell aging
Source: PubMed Central journal article supplement (PMC6224265; doi:10.18632/aging.101599), 2018-10-24
Supplement: aging-10-101599-s001.pdf [file aging-10-101599-s001.pdf]

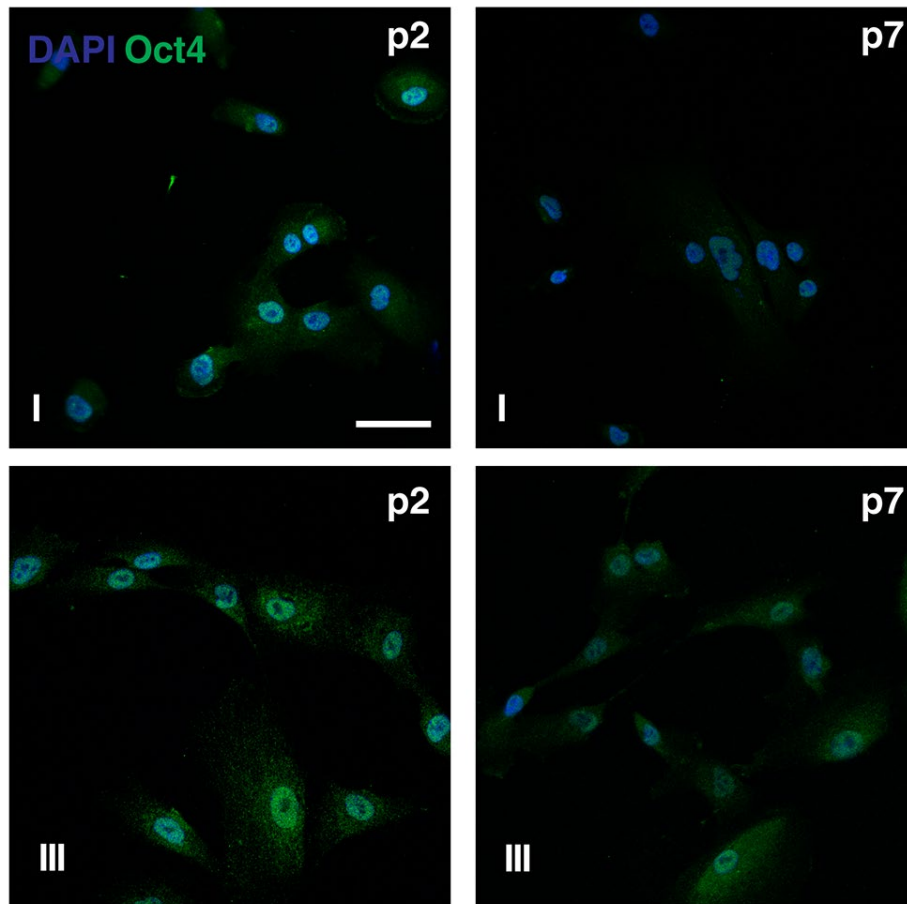

**Supplementary Figure S1. Oct4 decrease during culture passages.** Representative images of AFSC group I and III, at passage 2 and 7, labeled with DAPI (blue), Oct4 (green). Scale bar=10  $\mu$ m.
