# Supplementary material for: Nuclear Nox4 interaction with prelamin A is associated with nuclear redox control of stem cell aging
Source: publisher site journal article supplement (doi:10.18632/aging.101599), 2018-10-24
Supplement: Supplementary file [file aging-v10i10-101599-supplementary-material-SD2.pdf]

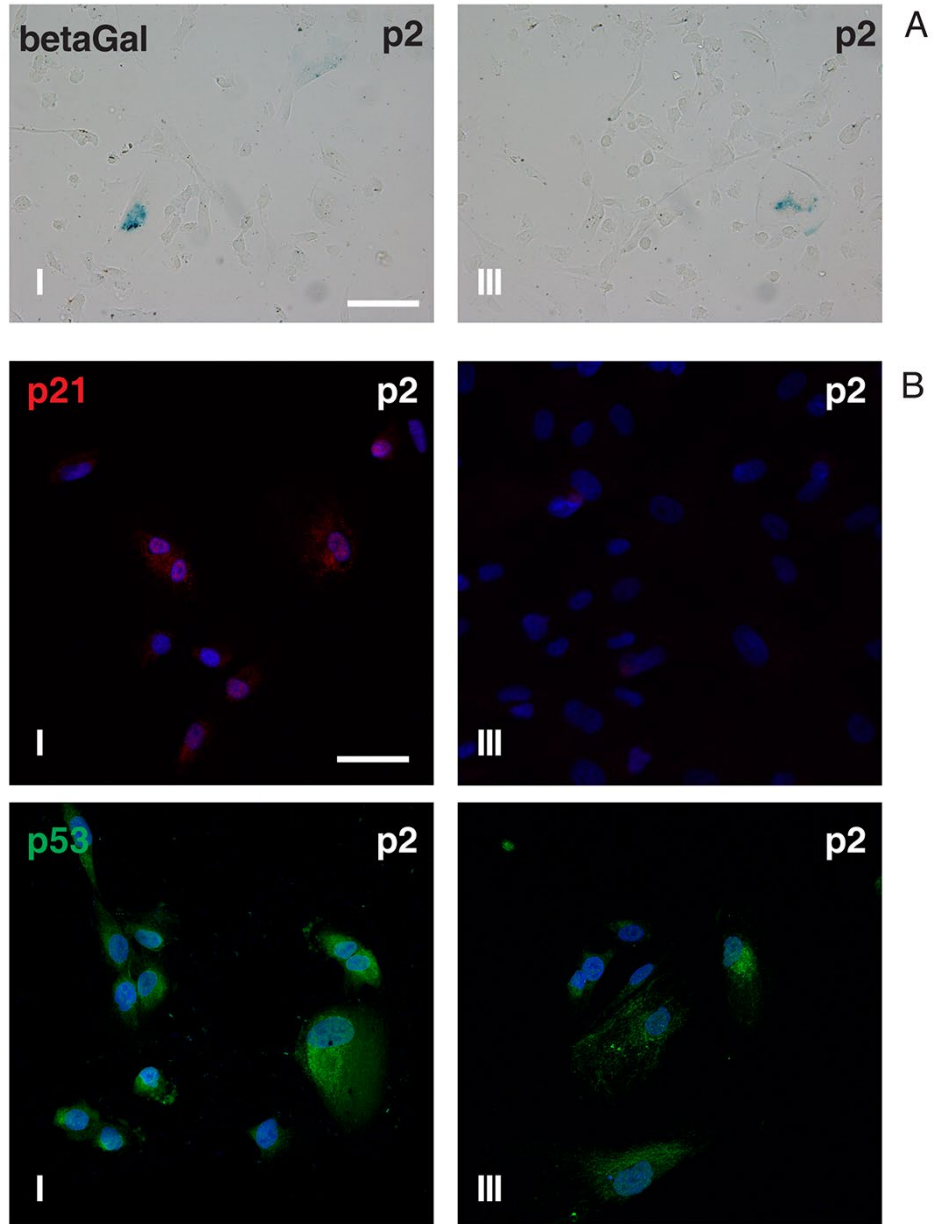

**Supplementary Figure S2. Senescence marker at early passages for AFSC groups.** (A) Representative images of beta-galactosidase assay performed in group I and III samples at passage 2. Senescent cells are blue stained. Scale bar=30  $\mu$ m. (B) Representative images of AFSC group II labeled with DAPI (blue), and p21 (red) or p53 (green). Scale bar=10  $\mu$ m.
