# Supplementary material for: Nuclear Nox4 interaction with prelamin A is associated with nuclear redox control of stem cell aging
Source: publisher site journal article supplement (doi:10.18632/aging.101599), 2018-10-24
Supplement: Supplementary file [file aging-v10i10-101599-supplementary-material-SD4.pdf]

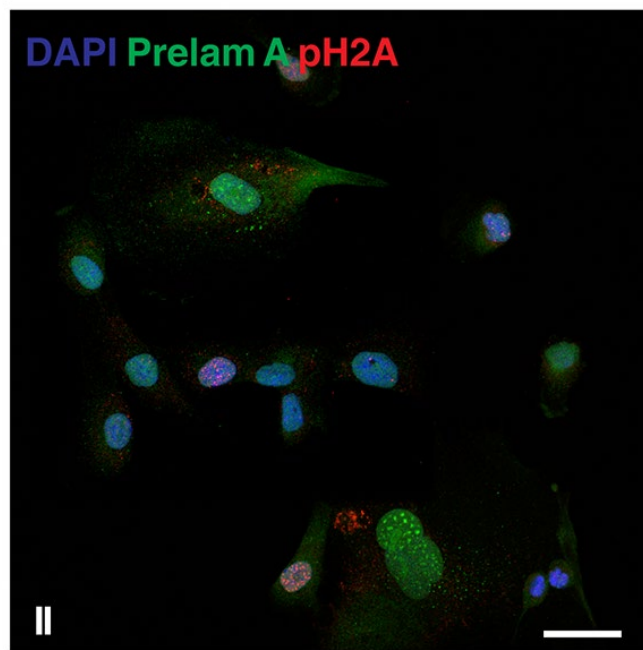

**Supplementary Figure S4. Prelamin A accumulation and DNA damage marker.** Representative images of AFSC group II labelled with DAPI (blue), Prelamin A (green) and pH2A (red). Scale bar=10  $\mu$ m.
