# Supplementary material for: Nuclear Nox4 interaction with prelamin A is associated with nuclear redox control of stem cell aging
Source: publisher site journal article supplement (doi:10.18632/aging.101599), 2018-10-24
Supplement: Supplementary file [file aging-v10i10-101599-supplementary-material-SD5.pdf]

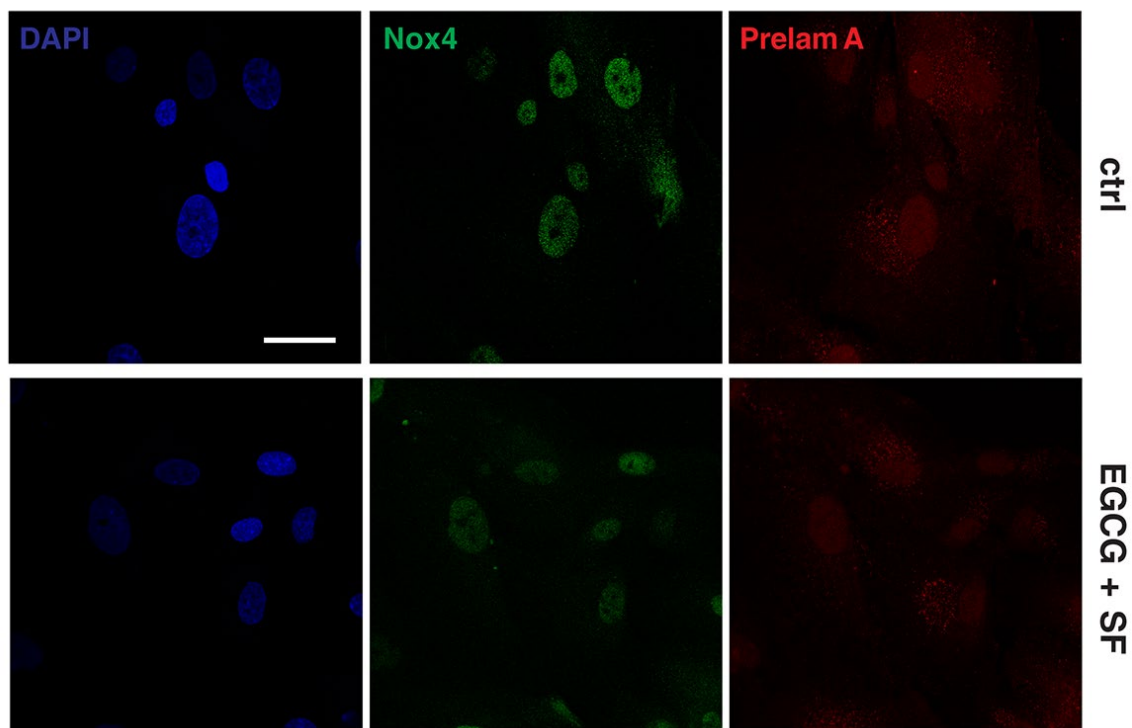

**Supplementary Figure S5. Effect of ROS decrease on Nox4 and prelamin A accumulation.** Representative images of AFSC group I and III, treated or not with 1  $\mu$ M sulforaphane (SF) and 10  $\mu$ M epigallocatechin gallate (EGCG) for 11 days, labelled with DAPI (blue), Nox4 (green) and Prelamin A (red). Scale bar=10  $\mu$ m.
