# Supplementary material for: Nuclear Nox4 interaction with prelamin A is associated with nuclear redox control of stem cell aging
Source: publisher site journal article supplement (doi:10.18632/aging.101599), 2018-10-24
Supplement: Supplementary file [file aging-v10i10-101599-supplementary-material-SD6.pdf]

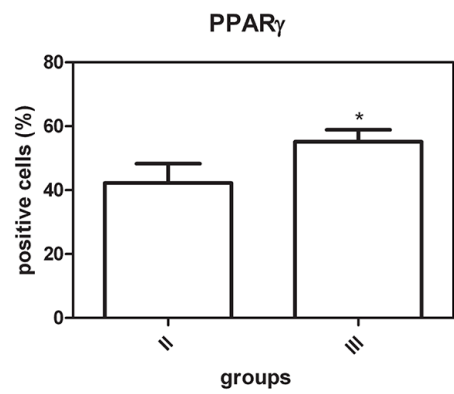

**Supplementary Figure S6. Adipogenic differentiation capability.** Graph showing the cytofluorimetric analysis of PPAR $\gamma$  expression among the groups II and III, after exposure to adipogenic differentiation. Four samples were analysed for each group. \*P < 0.05 = significantly different from group II.
